# Supplementary material for: Facile Preparation of Porous Carbon Flake-Supported Nickel Nanoplates as Effective Catalysts for Methanol Electrooxidation
Source: MDPI journal article supplement (doi:10.3390/catal12050556), 2022-05-18
Supplement: s1 [file s1]

# Facile preparation of porous carbon flake-supported nickel nanoplates as effective catalysts for methanol electrooxidation

Ali Aldalbahi <sup>1\*</sup>, Mohamed El-Newehy <sup>1</sup>, Hany El-Hamshary <sup>1</sup>, Edmund Samuel <sup>2</sup> and Sam S. Yoon <sup>3</sup>

<sup>1</sup> Department of Chemistry, College of Science, King Saud University, Riyadh 11451, Saudi Arabia; melnewehy@ksu.edu.sa (M.H.E.-N.); helhamshary@ksu.edu.sa (H.E.-H.)

<sup>2</sup> Energy Environment Policy and Technology, Graduate School of Energy and Environment (KU-KIST Green School), Korea University, Seoul 136-713, Korea; edsaedwin@rediffmail.com

<sup>3</sup> School of Mechanical Engineering, Korea University, Seoul 136-713, Korea; skyoon@korea.ac.kr

\* Correspondence: aaldalbahi@ksu.edu.sa

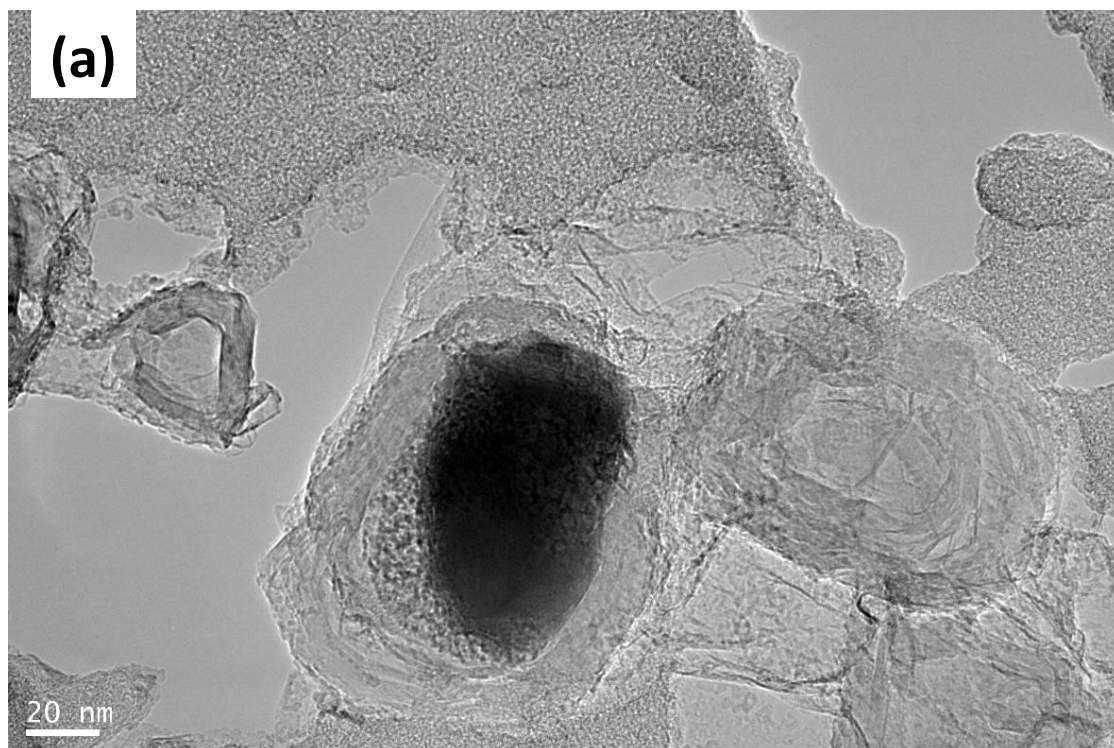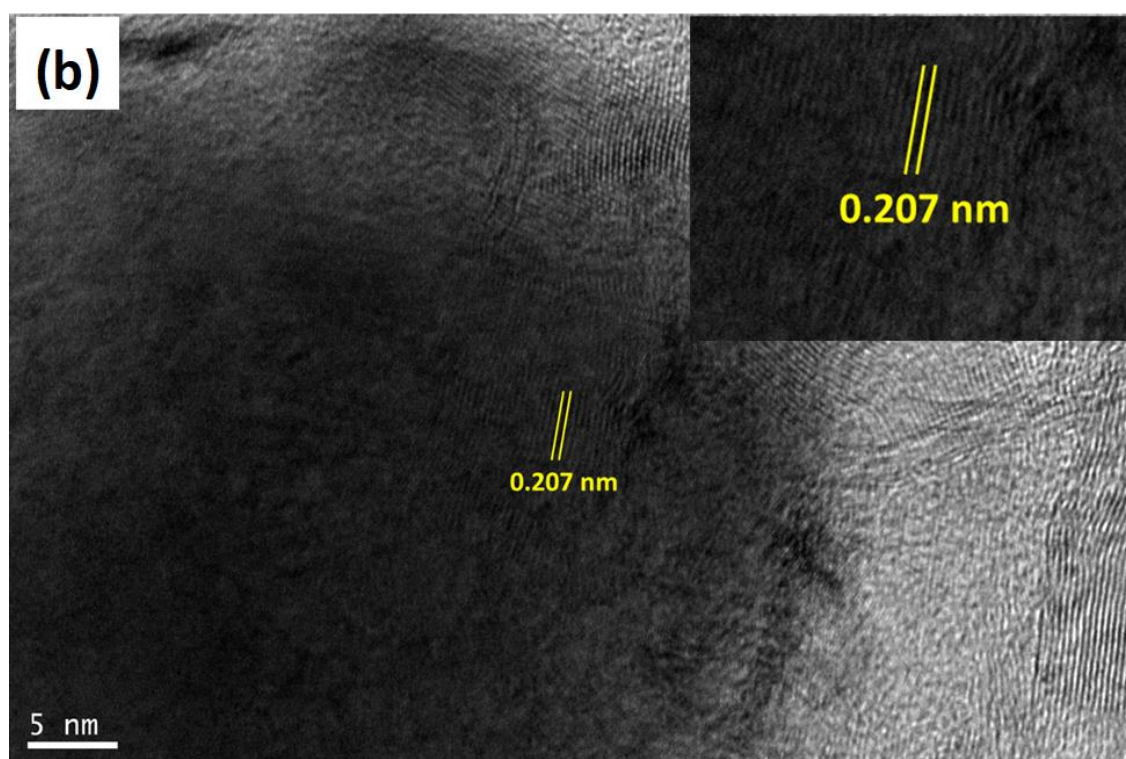

**Figure S1:** HRTEM images (a) 20nm; (b) 5 nm of Ni NPs@PCFs.

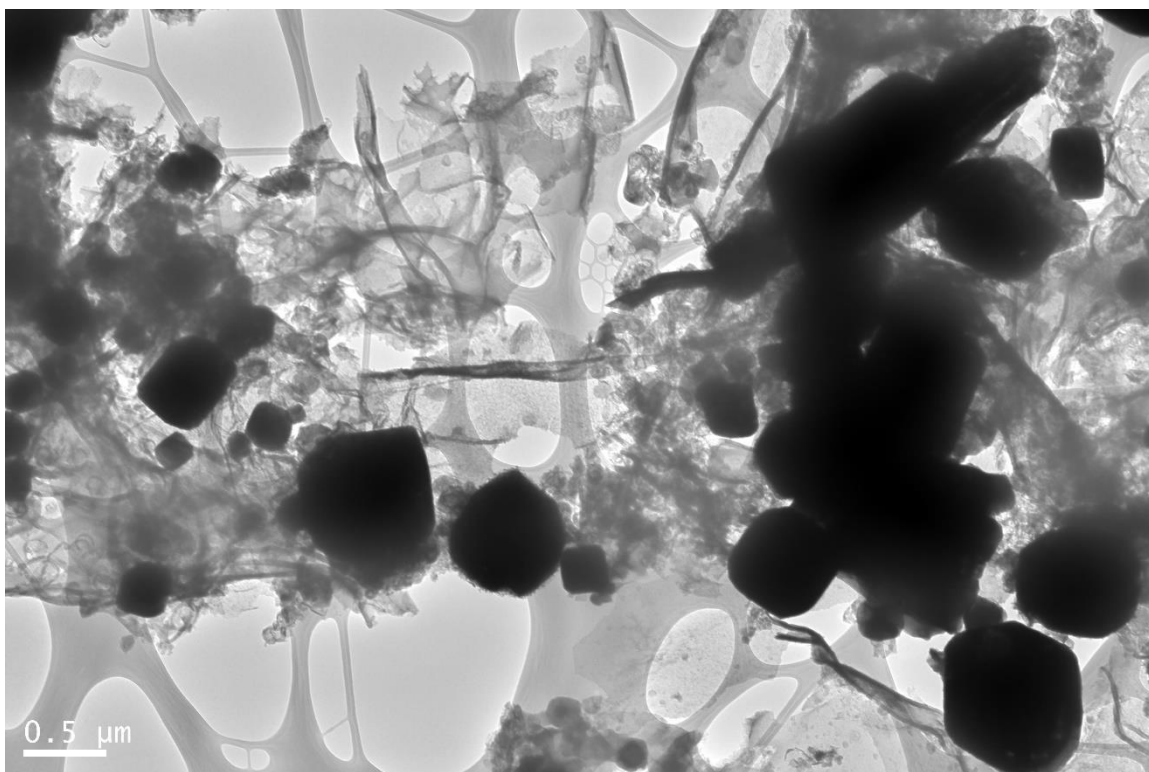

**Figure S2:** TEM images of NiNPs@PCFs after test durability.
